# Supplementary material
Source: Research Square preprint supplement (doi:10.21203/rs.3.rs-9360400/v1)
Supplement: Supplementary file 1 [file a4dd10e78cdd44de68c4833d.docx]

**Supplementary data :**

**Supplementary_data_S1**


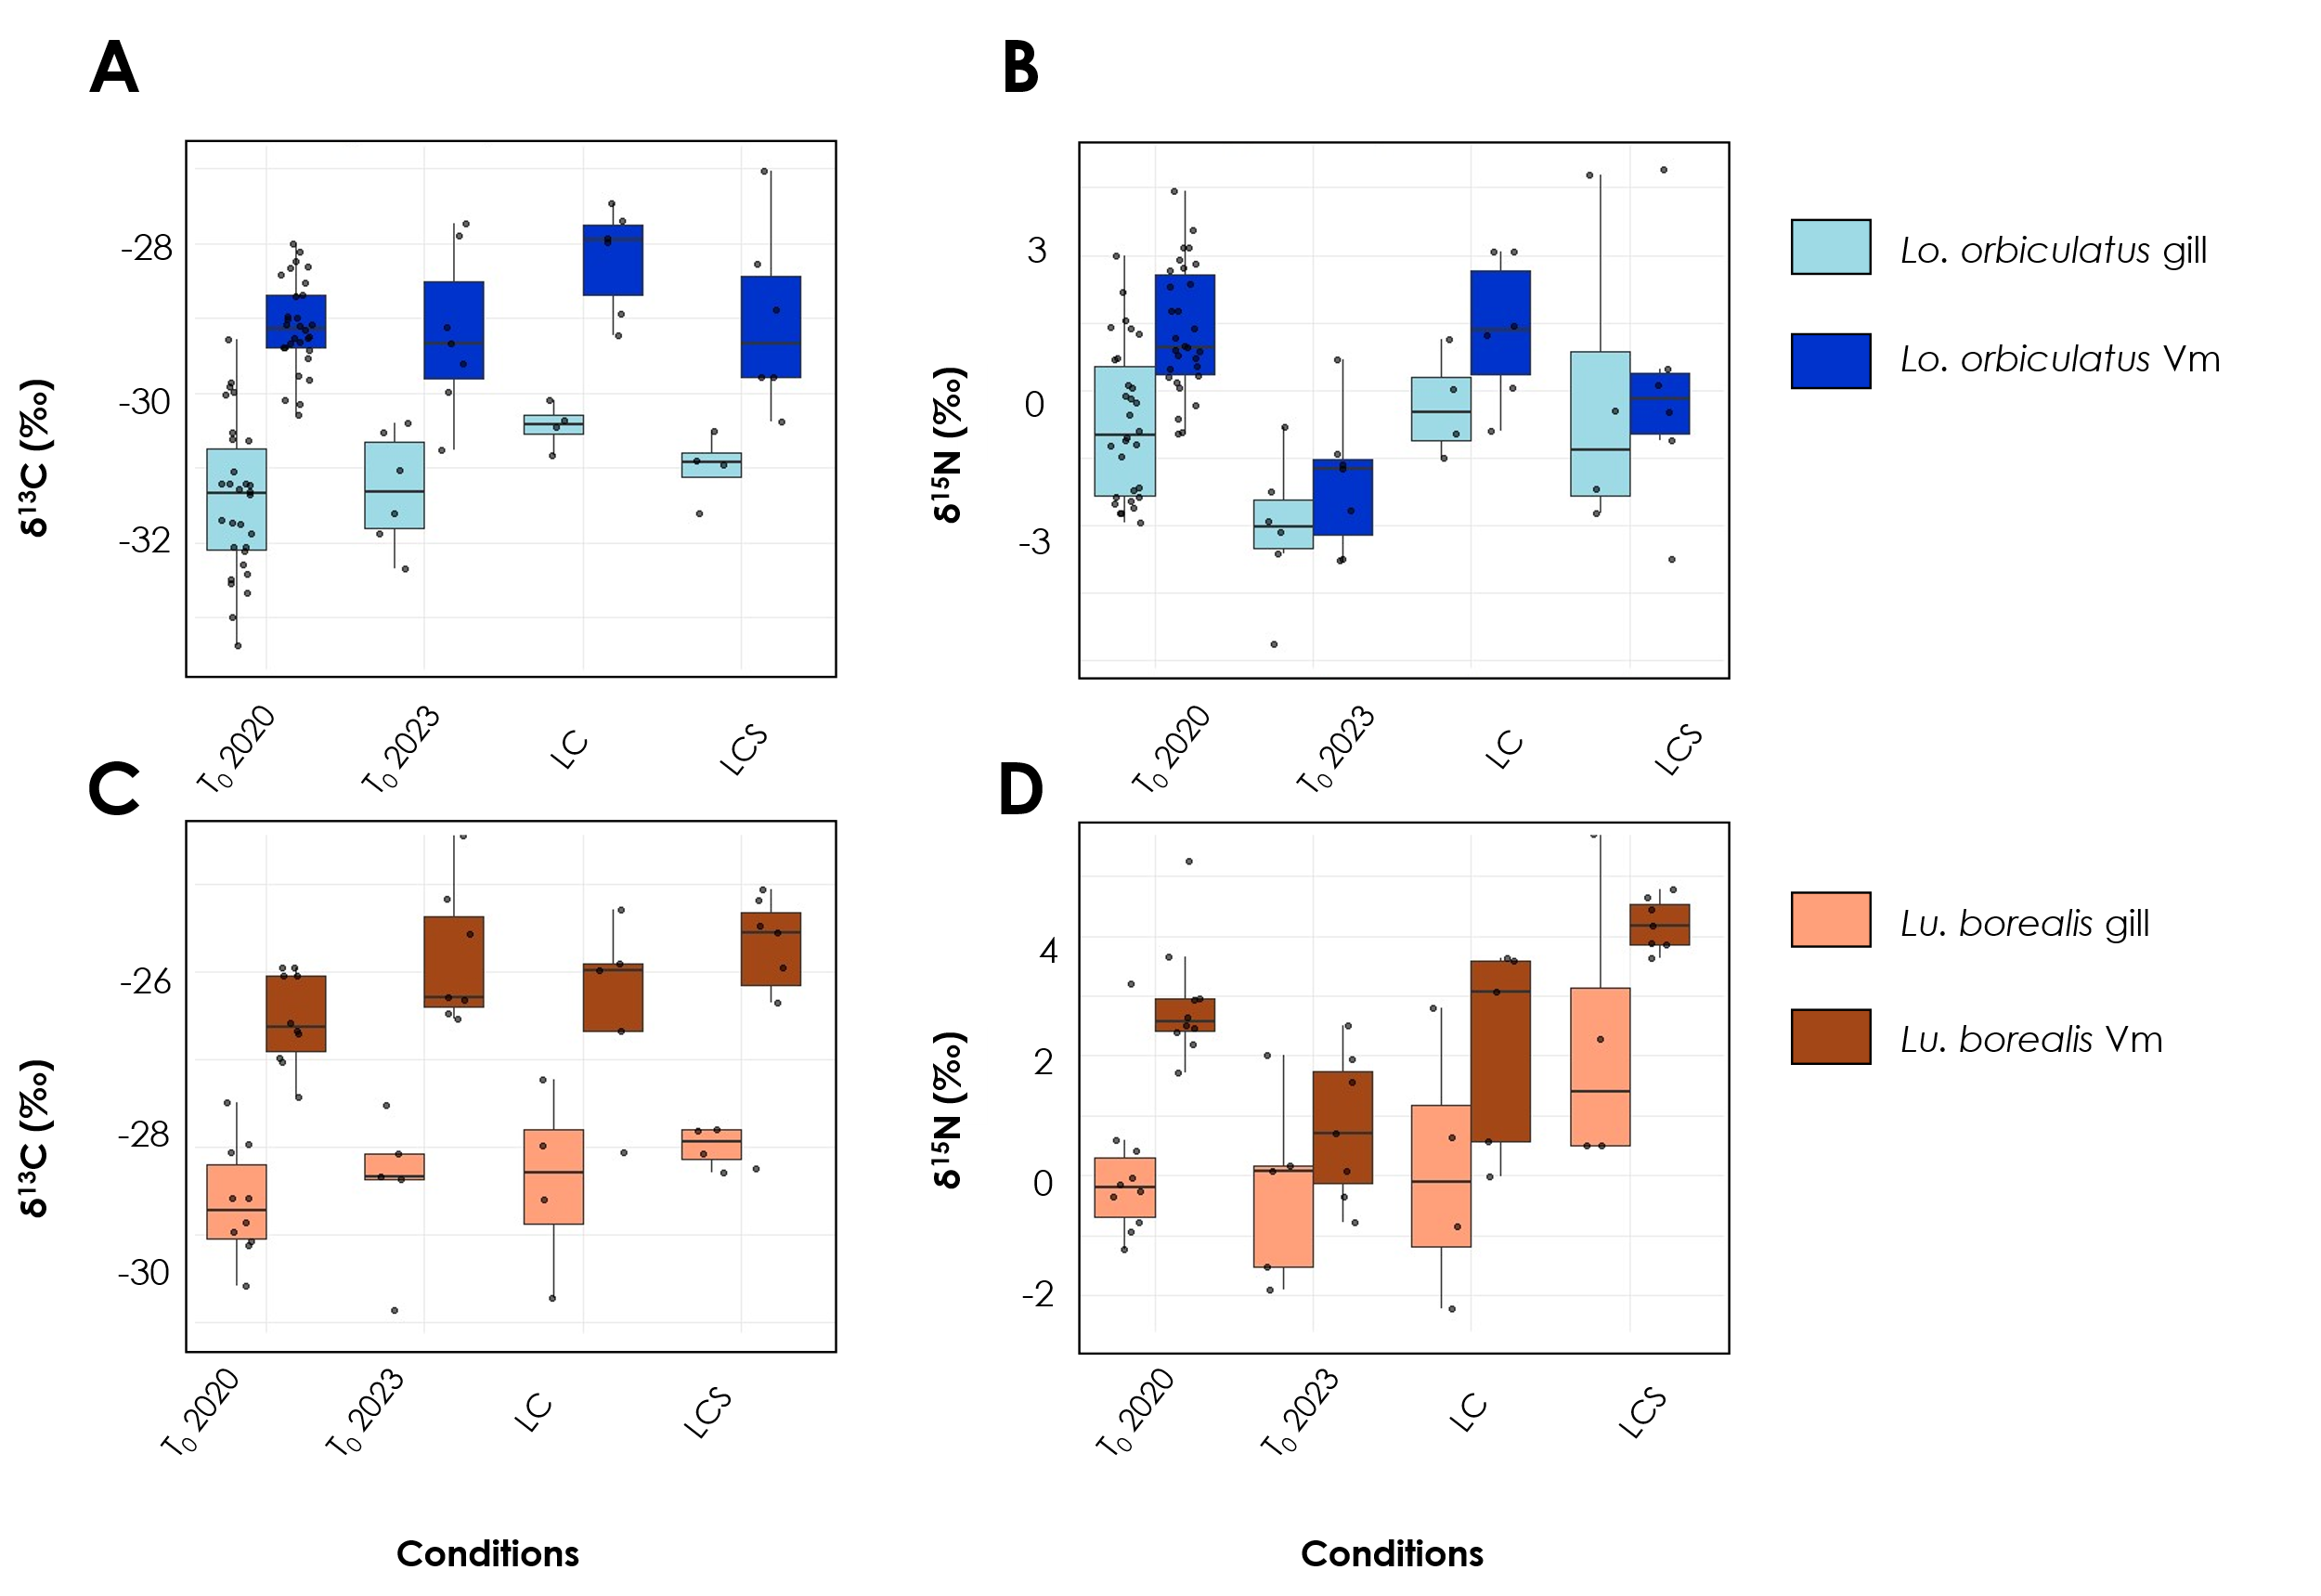


**Supplementary_figure_S1:** Boxplot of isotopic signatures of Lucinidae in February 2020 and 2023 compared to experimental controls.A) δ13C isotopic signature of *Lo. orbiculatus*. Gill in light blue, visceral mass in dark blue. B) δ15N isotopic signature of *Lo. orbiculatus*. Gill in light blue, visceral mass in dark blue. C) δ13C isotopic signature of *Lu. borealis*. Gill in light brown, visceral mass in dark brown. D) δ15N isotopic signature of *Lu. borealis*. Gill in light blue, visceral mass in dark blue. T0 2020: Seagrass bed-associated Lucinidae sampled in 2020. T0 2023: Seagrass bed-associated Lucinidae sampled in 2023. LC: Lucinidae only control. LCS: Lucinidae with Na2S control.

**Supplementary_table_S1**

>ODB85511.1 ribulose-bisphosphate carboxylase large subunit [Candidatus Thiodiazotropha endoloripes] MAKKYDAGVKEYRETYWMPEYTPLDTDILACFKVTPQPGVPREEVAAAVAAESSTGTWTTVWTDLLTDLD

HYKGRAYAIEDVPGDDTCFYAFVAYPIDLFEEGSVVNVMTSLVGNVFGFKALRALRLEDIRFPIAYVMTC

NGPPQGIQVERDMLNKYGRPLLGCTIKPKLGLSAKNYGRACYEGLRGGLDFTKDDENVNSQPFMRWKHRF

DFVMEAIQKAEAETGERKGHYLNVTAPTSDEMMKRAEYAKEIGAPIIMHDYITGGWSANTQLAQWCQDNG

MLLHIHRAMHAVLDRNPHHGIHFRVLTKILRLSGGDHLHSGTVVGKLEGDRDATLGWIDIMRDSFVKEDR

SRGIFFDQDWGSMPGVLPVASGGIHVWHMPALVNIFGDDSVLQFGGGTLGHPWGNAAGAAANRVAVEACV

EARNQGRELEKEGKDILTNAAASSPELKAAMETWKEIKFEFDTVDKLDVSHK

>MCG7982264.1 MAG: form I ribulose bisphosphate carboxylase large subunit [Candidatus Thiodiazotropha lotti] MAKKYDAGVKEYRETYWMPEYTPLDTDILACFKVTPQPGVPREEVAAAVAAESSTGTWTTVWTDLLTDLD

HYKGRAYAIEDVPGDDTCFYAFVAYPIDLFEEGSVVNVMTSLVGNVFGFKALRALRLEDIRFPIAYVMTC

NGPPQGIQVERDMLNKYGRPLLGCTIKPKLGLSAKNYGRACYEGLRGGLDFTKDDENVNSQPFMRWKHRF

DFVMEAIQKAEAETGERKGHYLNVTAPTSDEMMKRAEYAKEIGAPIIMHDYITGGWSANTQLAQWCQDNG

MLLHIHRAMHAVLDRNPHHGIHFRVLTKILRLSGGDHLHSGTVVGKLEGDRDATLGWIDIMRDSYVKEDR

SRGIFFDQDWGSMPGVLPVASGGIHVWHMPALVNIFGDDSVLQFGGGTLGHPWGNAAGAAANRVAVEACV

EARNQGRELEKEGKDILTNAAASSPELKAAMETWKEIKFEFDTVDKLDVSHK

>MCG8426934.1 MAG: form I ribulose bisphosphate carboxylase large subunit [Chromatiales bacterium] MAKKYDAGVKEYRETYWMPDYTPKDTDILACFKVTPQPGVPREEVAAAVAAESSTGTWTTVWTDLLTDLD

YYKGRAYAIEDVPGDDTCFYAFVAYPIDLFEEGSVVNVMTSLVGNVFGFKALRALRLEDIRFPLAYVMTC

NGPPQGIQVERDMLNKYGRPLLGCTIKPKLGLSAKNYGRACYEGLRGGLDFTKDDENVNSQPFMRWKHRF

DFVMEAIQKAEAETGERKGHYLNVTAPTADEMMKRAEYAKEIGAPIIMHDYLTGGWSANTQLAQWCRDNG

MLLHIHRAMHAVLDRNPHHGIHFRVLTKILRLSGGDHLHSGTVVGKLEGDRDATLGWIDIMRDSYVKEDR

SRGIFFDQDWGAMPGVLPVASGGIHVWHMPALVNIFGDDSVLQFGGGTLGHPWGNAAGAAANRVAVEACV

EARNQGRELEKEGKDILTNAAASSPELKAAMETWKEIKFEFDTVDKLDVSHK

>MBV2091673.1 MAG: form I ribulose bisphosphate carboxylase large subunit [Candidatus Thiodiazotropha sp. (ex Ctena orbiculata)] MAKKYDAGVKEYRETYWMPDYTPKETDILACFKVTPQPGVPREEVAAAVAAESSTGTWTTVWTDLLTDLD

YYKGRAYAIEDVPGDDTCFYAFVAYPIDLFEEGSVVNVMTSLVGNVFGFKALRALRLEDIRFPLAYVLTC

NGPPQGIQVERDMLNKYGRPLLGCTIKPKLGLSAKNYGRACYEGLRGGLDFTKDDENVNSQPFMRWKHRF

DFVMEAIHKAEAETGERKGHYLNVTAPTADEMMKRAEYAKEIGAPIIMHDYLTGGWSANTQLAQWCQDNG

MLLHIHRAMHAVLDRNPHHGIHFRVLTKILRLSGGDHLHSGTVVGKLEGDRDATLGWIDIMRDSFVKEDR

SRGIFFDQDWGSMPGVLPVASGGIHVWHMPALVNIFGDDSVLQFGGGTLGHPWGNAAGAAANRVAVEACV

EARNQGRELEKEGKDILTNAAASSPELKAAMETWKEIKFEFDTVDKLDVSHK

>WP_078477020.1 form I ribulose bisphosphate carboxylase large subunit [Solemya elarraichensis gill symbiont] MAKTYDAGVKEYRETYWMPEYTPLDTDILACFKVTPQPGVPREEVAAAVAAESSTGTWTTVWTDLLTDLD

HYKGRAYAIEDVPGDDTCFYAFIAYPIDLFEEGSVVNVMTSLVGNVFGFKALRALRLEDIRFPIAYVMTC

NGPPQGIQVERDLLNKYGRPLLGCTIKPKLGLSAKNYGRACYEGLRGGLDFTKDDENVNSQPFMRWRHRF

DFVMEAIQKAEAETGERKGHYLNVTAPTSDEMMKRAEYAKEIGAPIIMHDYITGGWSANTQLAQWCQDNG

MLLHIHRAMHAVLDRNPHHGIHFRVLTKILRLSGGDHLHSGTVVGKLEGDREATLGWIDIMRDSFVKEDR

SRGIFFDQDWGSMPGVLPVASGGIHVWHMPALVNIFGDDSVLQFGGGTLGHPWGNAAGAAANRVAVEACV

EARNSGRELEKEGKEILTAAAAHSPELKAAMETWKEIKFEFDTVDKLDVSHK

>AAC32549.1 ribulose-1,5-bisphosphate carboxylase/oxygenase large subunit [Halothiobacillus neapolitanus c2] MAVKKYSAGVKEYRQTYWMPEYTPLDSDILACFKITPQPGVDREEAAAAVAAESSTGTWTTVWTDLLTDM

DYYKGRAYRIEDVPGDDAAFYAFIAYPIDLFEEGSVVNVFTSLVGNVFGFKAVRGLRLEDVRFPLAYVKT

CGGPPHGIQVERDKMNKYGRPLLGCTIKPKLGLSAKNYGRAVYECLRGGLDFTKDDENINSQPFMRWRDR

FLFVQDATETAEAQTGERKGHYLNVTAPTPEEMYKRAEFAKEIGAPIIMHDYITGGFTANTGLAKWCQDN

GVLLHIHRAMHAVIDRNPNHGIHFRVLTKILRLSGGDHLHTGTVVGKLEGDRASTLGWIDLLRESFIPED

RSRGIFFDQDWGSMPGVFAVASGGIHVWHMPALVNIFGDDSVLQFGGGTLGHPWGNAAGAAANRVALEAC

VEARNQGRDIEKEGKEILTAAAQHSPELKIAMETWKEIKFEFDTVDKLDTQNR

>BAC09058.1 ribulose-1,5-bisphosphate carboxylase/oxygenase large subunit [Thermosynechococcus vestitus BP-1] MAYTQSKSQKVGYQAGVKDYRLTYYTPDYTPKDTDILAAFRVTPQPGVPFEEAAAAVAAESSTGTWTTVW

TDLLTDLDRYKGCCYDIEPLPGEDNQFIAYIAYPLDLFEEGSVTNMLTSIVGNVFGFKALKALRLEDLRI

PVAYLKTFQGPPHGIQVERDKLNKYGRPLLGCTIKPKLGLSAKNYGRAVYECLRGGLDFTKDDENINSQP

FQRWRDRFLFVADAIHKAQAETGEIKGHYLNVTAPTCEEMLKRAEFAKELEMPIIMHDFLTAGFTANTTL

SKWCRDNGMLLHIHRAMHAVMDRQKNHGIHFRVLAKCLRMSGGDHIHTGTVVGKLEGDKAVTLGFVDLLR

ENYIEQDRSRGIYFTQDWASMPGVMAVASGGIHVWHMPALVDIFGDDAVLQFGGGTLGHPWGNAPGATAN

RVALEACIQARNEGRDLMREGGDIIREAARWSPELAAACELWKEIKFEFEAQDTI

>BAD78320.1 ribulose-1,5-bisphosphate carboxylase/oxygenase large subunit [Synechococcus elongatus PCC 6301] MPKTQSAAGYKAGVKDYKLTYYTPDYTPKDTDLLAAFRFSPQPGVPADEAGAAIAAESSTGTWTTVWTDL

LTDMDRYKGKCYHIEPVQGEENSYFAFIAYPLDLFEEGSVTNILTSIVGNVFGFKAIRSLRLEDIRFPVA

LVKTFQGPPHGIQVERDLLNKYGRPMLGCTIKPKLGLSAKNYGRAVYECLRGGLDFTKDDENINSQPFQR

WRDRFLFVADAIHKSQAETGEIKGHYLNVTAPTCEEMMKRAEFAKELGMPIIMHDFLTAGFTANTTLAKW

CRDNGVLLHIHRAMHAVIDRQRNHGIHFRVLAKCLRLSGGDHLHSGTVVGKLEGDKASTLGFVDLMREDH

IEADRSRGVFFTQDWASMPGVLPVASGGIHVWHMPALVEIFGDDSVLQFGGGTLGHPWGNAPGATANRVA

LEACVQARNEGRDLYREGGDILREAGKWSPELAAALDLWKEIKFEFETMDKL

>BAB77890.1 ribulose-1,5-bisphosphate carboxylase/oxygenase large subunit [Nostoc sp. PCC 7120 = FACHB-418] MSYAQTKTQTKSGYKAGVQDYRLTYYTPDYTPKDTDILAAFRVTPQPGVPFEEAAAAVAAESSTGTWTTV

WTDLLTDLDRYKGRCYDIEPVPGEDNQFIAYIAYPLDLFEEGSITNVLTSIVGNVFGFKALRALRLEDIR

FPVAYIKTFQGPPHGIQVERDKLNKYGRPLLGCTIKPKLGLSAKNYGRAVYECLRGGLDFTKDDENINSA

PFQRWRDRFLFVADAITKAQAETGEIKGHYLNVTAPTCEEMLKRAEYAKELKQPIIMHDYLTAGFTANTT

LARWCRDNGVLLHIHRAMHAVIDRQKNHGIHFRVLAKALRLSGGDHIHTGTVVGKLEGERGITMGFVDLL

RENYVEQDKSRGIYFTQDWASLPGVMAVASGGIHVWHMPALVEIFGDDSVLQFGGGTLGHPWGNAPGATA

NRVALEACVQARNEGRNLAREGNDVIREAAKWSPELAVACELWKEIKFEFEAMDTV

>BAA33863.1 Ribulose 1,5-bisphosphate carboxylase/oxygenase [Thermococcus kodakarensis KOD1] MVEKFDTIYDYYVDKGYEPSKKRDIIAVFRVTPAEGYTIEQAAGAVAAESSTGTWTTLYPWYEQERWADL

SAKAYDFHDMGDGSWIVRIAYPFHAFEEANLPGLLASIAGNIFGMKRVKGLRLEDLYFPEKLIREFDGPA

FGIEGVRKMLEIKDRPIYGVVPKPKVGYSPEEFEKLAYDLLSNGADYMKDDENLTSPWYNRFEERAEIMA

KIIDKVENETGEKKTWFANITADLLEMEQRLEVLADLGLKHAMVDVVITGWGALRYIRDLAADYGLAIHG

HRAMHAAFTRNPYHGISMFVLAKLYRLIGIDQLHVGTAGAGKLEGGKWDVIQNARILRESHYKPDENDVF

HLEQKFYSIKAAFPTSSGGLHPGNIQPVIEALGTDIVLQLGGGTLGHPDGPAAGARAVRQAIDAIMQGIP

LDEYAKTHKELARALEKWGHVTPV

>AAB89603.1 ribulose bisphosphate carboxylase, large subunit (rbcL-2) [Archaeoglobus fulgidus DSM 4304] MAEFEIYREYVDKSYEPQKDDIVAVFRITPAEGFTIEDAAGAVAAESSTGTWTSLHPWYDEERVKGLSAK

AYDFVDLGDGSSIVRIAYPSELFEPHNMPGLLASIAGNVFGMKRVKGLRLEDLQLPKSFLKDFKGPSKGK

EGVKKIFGVADRPIVGTVPKPKVGYSAEEVEKLAYELLSGGMDYIKDDENLTSPAYCRFEERAERIMKVI

EKVEAETGEKKSWFANITADVREMERRLKLVAELGNPHVMVDVVITGWGALEYIRDLAEDYDLAIHGHRA

MHAAFTRNAKHGISMFVLAKLYRIIGIDQLHIGTAGAGKLEGQKWDTVQNARIFSEVEYTPDEGDAFHLS

QNFHHIKPAMPVSSGGLHPGNLEPVIDALGKEIVIQVGGGVLGHPMGAKAGAKAVRQALDAIISAIPLEE

HAKQHPELQAALEKWGRVTPI

>AAM07894.1 ribulose bisphosphate carboxylase, large subunit [Methanosarcina acetivorans C2A] MRRDYVDPGYSPKDTDLICEFHIEPAAGISFEEASTHMAGESSIDSWTEISTLSPELAARLKPHVFYLDA

DTQTVRVAYSEDLFELGSVPQVLSAVAGNIFSMKIVDNLRLQDITFPKSMLREFEGPNFGLPGVRDIVGV

KDRPLVGTIVKPKVGLTSEMHAEVAYNAFAGGCDLVKDDENLTDQKFNGFEKRAELTLKIAEKAEAETGE

RKMYLCNITAPTCEEMIRRLHVLKDLGASYAMIDIVPTGWTALQTLREAAADEGLALHAHRCMHSAFTRN

PRHGVSMLLVAKLCRLIGLDQLHIGTVVGKMHGDKDEVLSIRDECVLDTVPADPEQHVLAQDWGGLKPMF

PVASGGLAPTMIPDLYSIFGKEVIMQFGGGIHAHPMGTAAGAAACRQALEASLEGISLQDYAKDHKELEA

ALGKWLEK

>AAB99239.1 ribulose bisphosphate carboxylase, large subunit (rbcL) [Methanocaldococcus jannaschii DSM 2661] MDYINLNYRPNEGDLLSCMVIKGENLEKLANEIAGESSIGTWTKVQTMKSDIYEKLRPKVYEIKEIGEEN

GYKVGLIKIAYPLYDFEINNMPGVLAGIAGNIFGMKIAKGLRILDFRFPAEFVKAYKGPRFGIEGVRETL

KIKERPLLGTIVKPKVGLKTEEHAKVAYEAWVGGVDLVKDDENLTSQEFNKFEDRIYKTLEMRDKAEEET

GERKAYMPNITAPYREMIRRAEIAEDAGSEYVMIDVVVCGFSAVQSFREEDFKFIIHAHRAMHAAMTRSR

DFGISMLALAKIYRLLGVDQLHIGTVVGKMEGGEKEVKAIRDEIVYDKVEADNENKFFNQDWFDIKPVFP

VSSGGVHPRLVPKIVEILGRDLIIQAGGGVHGHPDGTRAGAKAMRAAIEAIIEGKSLEEKAEEVAELKKA

LEYWK

>ACJ16722.1 ribulose 1,5-bisphosphate carboxylase/oxygenase, typeIII [Thermococcus onnurineus NA1] MVEKFDKIYDYYVDKSYEPNKKRDIIAVFRITPAEGYTIEQVAGGVAAESSTGTWTTLYNWYEEERWADL

SAKAYDFIDMGDGSWIVKIAYPFHAFEEANLPGLLASIAGNVFGMRRAKGLRLEDMYFPEKLIREFSGPA

FGIEGVRKMLEIKDRPIYGVVPKPKVGYSPEEFEKLSYELLLNGADYMKDDENLTSPWYNRFEERAETIA

KIIEKVESETGEKKTWFANITADVREMERRLEILADLGLKHAMVDVVITGWGALEYIRDLAADYGLAIHG

HRAMHATFTRNPYHGISMFVLAKLYRLIGIDQLHVGTAGAGKLEGGKWDVIQNARILREEHYKPDENDVF

HLEQKFYSIKPAFPTSSGGLHPGNLPIVIDALGTDIVLQLGGGTLGHPDGPAAGARAVRQAIDALVQGIP

LDEYAKTHKELARALEKWGHVTPI

>BAA14229.1 ribulose 1,5-bisphosphate carboxylase/oxygenase large subunit precursor [Allochromatium vinosum DSM 180] MSTKTYDAGVKDYALTYWTPDYVPLDSDLLACFKVTPQAKVSREEAAAAVAAESSTGTWTTVWSDLLTDL

DYYKGRAYRIEDVPGDKESFYAFIAYPLDLFEEGSIVNVLTSLVGNVFGFKAVRALRLEDIRFPLHYVKT

CGGPRNGIQVERDRMDKYGRPFLGATVKPKLGLSAKNYGRAVYEMLRGGLDFTKDDENVNSQPFMRWQNR

FEFVSEAVRKAREETGERKGHYLNVTAPTCEEMFKRAEFAKECGAPIIMHDFLTGGFTANTSLANWCRDN

GMLLHIHRAMHAVIDRHPKHGIHFRVLAKCLRLSGGDHLHTGTVVGKLEGDRQSTLGFVDQLRESFIPED

RSRGLFFDQDWGGMPGVMAVASGGIHVWHIPALVTIFGDDSVLQFGGGTQGHPWGNAAGAAANRVATEAC

VKARNEGVEIEKHAREVLSDAARHSPELAVAMETWKEIKFEFDVVDKLDAA

>AAD10331.1 ribulose-1,5-bisphosphate carboxylase/oxygenase large subunit [Hydrogenophaga pseudoflava] MATKTYNAGVKEYRSTYWEPHYTPKDTDILACFKITPQPGVDREEVAAAVAAESSTGTWTTVWTDLLTDL

DYYKGRAYRIEDVPGDDTCFYAFVAYPIDLFEEGSVVNVLTSLVGNVFGFKALRALRSEDVRFPIAYVKT

CGGPPHGIQVERDIMNKYGRPLLGCTIKPKLGLSGKNYGRAVYECLRGGLDFTKDDENVNSQPFMRWPQR

FDFEQEAIEKAHGETGERKVHYLNVTAPTPGEMYKRAEYAKELGAPIIMHDYLTGGLCANTGLANWCRDN

GMLLHIHRAMHAELDRNPHHGIHFRVLTKVLRLSGRDHLHSGTVVGKLEGDRASTLGWIDIMRDTFIKED

RSRGIFFDQDFGSMPGVMPVASGGIHVWHMPALVNIFGDDSVLQFGGGTVGHPWGNAPGATANRVELEAC

VKARNEGIAVEKEGKAVLTEAANDSPELKIAMETWKEIKFEFDTVDKLDIAHK

>ODJ86465.1 ribulose bisphosphate carboxylase large chain 1 [Candidatus Thiodiazotropha endolucinida] MAKKYDAGVKEYRETYWMPEYTPADTDILACFKVVPQPGVPREEAAAAVAAESSTGTWTTVWTDLLTDLD

YYKGRAYAIEDVPGDDSCFYAFIAYPIDLFEEGSVVNVFTSLVGNVFGFKAVRALRLEDVRFPLAYVMTC

NGPPHGIQSERDKMNKYGRPLLGCTIKPKLGLSAKNYGRACYEGLRGGLDFTKDDENVNSQPFMRWRERF

NYVVEAIHKAEAETGERKGHYLNVTAPTPEEMYKRAEYAKELGAPIIMHDYLTGGFTANTGLAQWCRDNG

MLLHIHRAMHAVLDRNPHHGIHFRVLTKALRLSGGDHLHSGTVVGKLEGDRDATLGWIDIMRDSYIKEDR

SRGIFFDQDWGSMPGVLPVASGGIHVWHMPALVSIFGDDSVLQFGGGTLGHPWGNAAGAAANRVAVEACV

EARNQGRELEKEGKDILTNAAASSPELKAAMETWKEIKFEFDTVDKLDVSHK

>MCG7977528.1 MAG: form I ribulose bisphosphate carboxylase large subunit [Candidatus Thiodiazotropha taylori] MAKKYDAGVKEYRETYWMPEYTPADTDILACFKVVPQPGVPREEAAAAVAAESSTGTWTTVWTDLLTDLD

YYKGRAYAIEDVPGDDSCFYAFIAYPIDLFEEGSVVNVFTSLVGNVFGFKAVRALRLEDVRFPLAYVMTC

NGPPHGIQSERDKMNKYGRPLLGCTIKPKLGLSAKNYGRACYEGLRGGLDFTKDDENVNSQPFMRWRERF

NYVVEAIHKAEAETGERKGHYLNVTAPTPEEMYKRAEYAKELGAPIIMHDYLTGGFTANTGLAQWCRDNG

MLLHIHRAMHAVLDRNPHHGIHFRVLTKALRLSGGDHLHSGTVVGKLEGDRDATLGWIDIMRDSYIKEDR

SRGIFFDQDWGSMPGVLPVASGGIHVWHMPALVSIFGDDSVLQFGGGTLGHPWGNAAGAAANRVAVEACV

EARNQGRELEKEGKDILTNAAASSPELKAAMETWKEIKFEFDTVDKLDVSHK
